# Supplementary material for: A Link between Virulence and Homeostatic Responses to Hypoxia during Infection by the Human Fungal Pathogen Cryptococcus neoformans
Source: PubMed Central journal article supplement (PMC1803011; doi:10.1371/journal.ppat.0030022), 2007-02-23

FIGURE S1

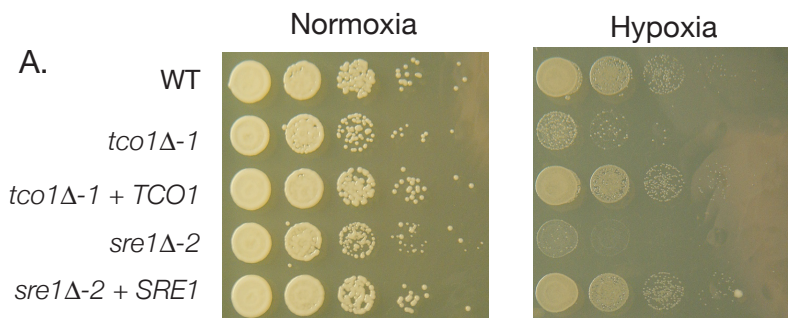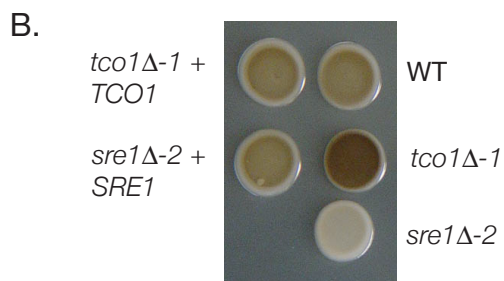

Supplement: ppat.0030022.sg001.pdf [file ppat.0030022.sg001.pdf]
